# Supplementary material for: Effects of Graphene Oxide and Reduced Graphene Oxide Nanostructures on CD4+ Th2 Lymphocytes
Source: MDPI journal article supplement (doi:10.3390/ijms231810625), 2022-09-13
Supplement: s1 [file s1]

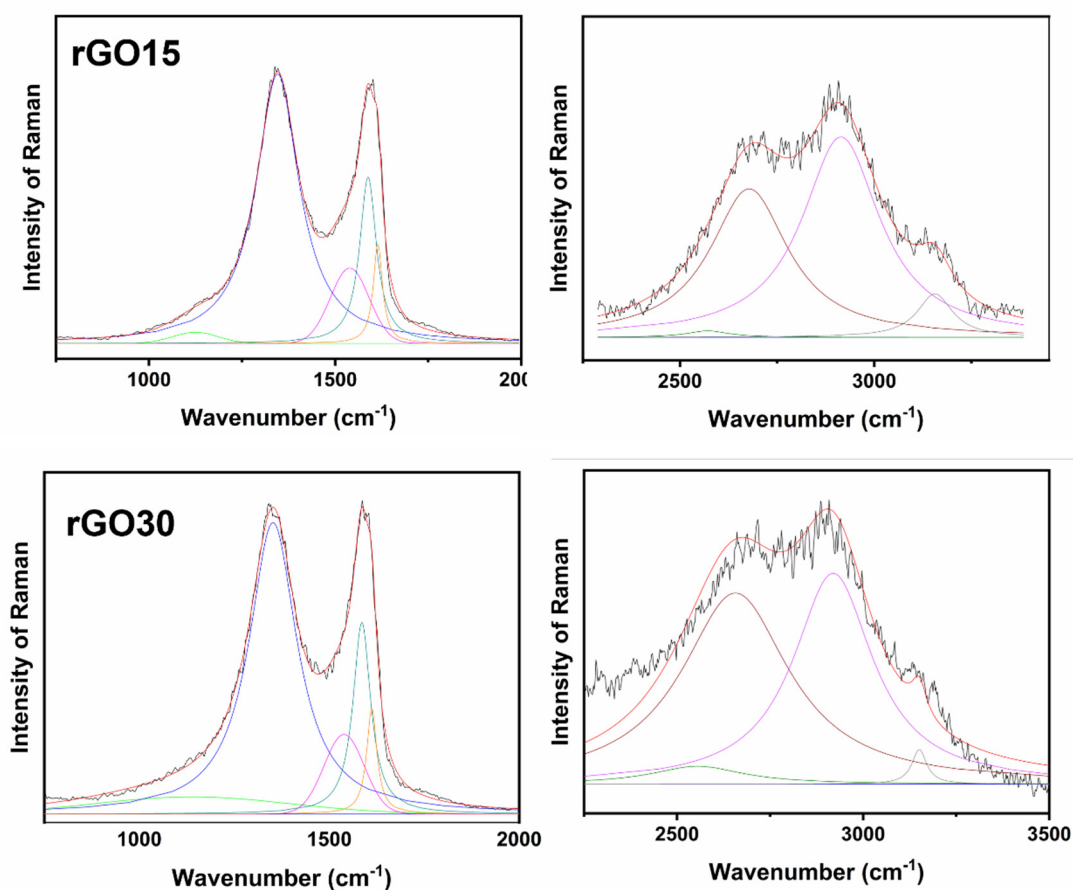

Figure S1: Deconvolution of first and second order Raman spectrum of reduced-graphene oxides

Table S1: Fitting parameters calculated for different rGO in the first and second order Raman spectra.

| Material   | D* (Gauss)             |                       |       | D (Ps-Voigt)           |                       |       | D'' (Gauss)            |                       |       | G (Ps-Voigt)           |                       |       | D' (Ps-Voigt)          |                       |       |
|------------|------------------------|-----------------------|-------|------------------------|-----------------------|-------|------------------------|-----------------------|-------|------------------------|-----------------------|-------|------------------------|-----------------------|-------|
|            | xc (cm <sup>-1</sup> ) | w (cm <sup>-1</sup> ) | A (%) | xc (cm <sup>-1</sup> ) | w (cm <sup>-1</sup> ) | A (%) | xc (cm <sup>-1</sup> ) | w (cm <sup>-1</sup> ) | A (%) | xc (cm <sup>-1</sup> ) | w (cm <sup>-1</sup> ) | A (%) | xc (cm <sup>-1</sup> ) | w (cm <sup>-1</sup> ) | A (%) |
| GO         | 1122                   | 125                   | 1     | 1347                   | 134                   | 62    | 1520                   | 114                   | 8     | 1582                   | 65                    | 20    | 1611                   | 35                    | 8     |
| rGO 15 min | 1125                   | 123                   | 2     | 1345                   | 141                   | 65    | 1538                   | 104                   | 12    | 1588                   | 55                    | 16    | 1615                   | 30                    | 5     |
| rGO 30 min | 1138                   | 512                   | 10    | 1352                   | 106                   | 60    | 1539                   | 106                   | 10    | 1586                   | 57                    | 15    | 1612                   | 33                    | 5     |

  

| Material   | G* (Lorentz)           |                       |       | 2D (Lorentz)           |                       |       | D+D' (Lorentz)         |                       |       | 2D' (Lorentz)          |                       |       |
|------------|------------------------|-----------------------|-------|------------------------|-----------------------|-------|------------------------|-----------------------|-------|------------------------|-----------------------|-------|
|            | xc (cm <sup>-1</sup> ) | w (cm <sup>-1</sup> ) | A (%) | xc (cm <sup>-1</sup> ) | w (cm <sup>-1</sup> ) | A (%) | xc (cm <sup>-1</sup> ) | w (cm <sup>-1</sup> ) | A (%) | xc (cm <sup>-1</sup> ) | w (cm <sup>-1</sup> ) | A (%) |
| GO         | 2529                   | 71                    | 0,3   | 2682                   | 253                   | 42    | 2920                   | 235                   | 52    | 3158                   | 105                   | 6     |
| rGO 15 min | 2571                   | 130                   | 1     | 2678                   | 245                   | 40    | 2914                   | 243                   | 54    | 3156                   | 110                   | 6     |
| rGO 30 min | 2555                   | 300                   | 4     | 2657                   | 351                   | 50    | 2919                   | 215                   | 44    | 3151                   | 48                    | 1     |

Table S2: Relative intensity and integrated area for some Raman bands of rGO.

| Materials  | $I_D/I_G$ | $A_{D'}/A_G$ | $A_D/A_G$ | $A_{D+D'}/A_D$ | $A_{2D'}/A_D$ | $A_{2D'}/A_{D+D'}$ |
|------------|-----------|--------------|-----------|----------------|---------------|--------------------|
| GO         | 1,6       | 0,4          | 3,1       | 0,83           | 0,09          | 0,12               |
| rGO 15 min | 1,79      | 0,31         | 4,06      | 0,83           | 0,09          | 0,11               |
| rGO 30 min | 1,72      | 0,33         | 4         | 0,73           | 0,02          | 0,02               |
